# Supplementary material for: Impact of hydrogen bonding interaction energy on the polymerization kinetics of polymerizable deep eutectic solvent monomers
Source: Royal Society of Chemistry journal article supplement (doi:10.1039/d3py01255g), 2024-01-01
Supplement: d3py01255g4.pdf [file d3py01255g4.pdf]

# Impact of Hydrogen Bonding Interaction Energy on Polymerization Kinetics of Polymerizable Deep Eutectic Solvents Monomers

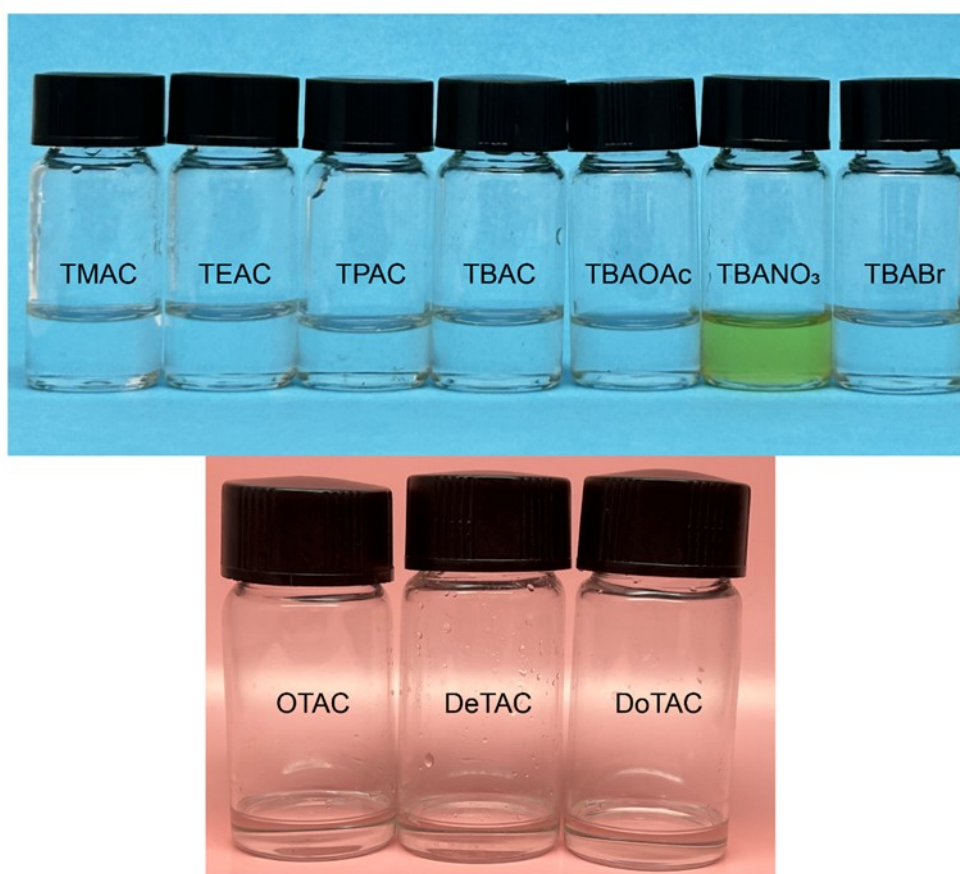

Fig.S1 Optical photographs of PDES monomers formed by AA and different hydrogen bond donors at a molar ratio of 3:1/4:1

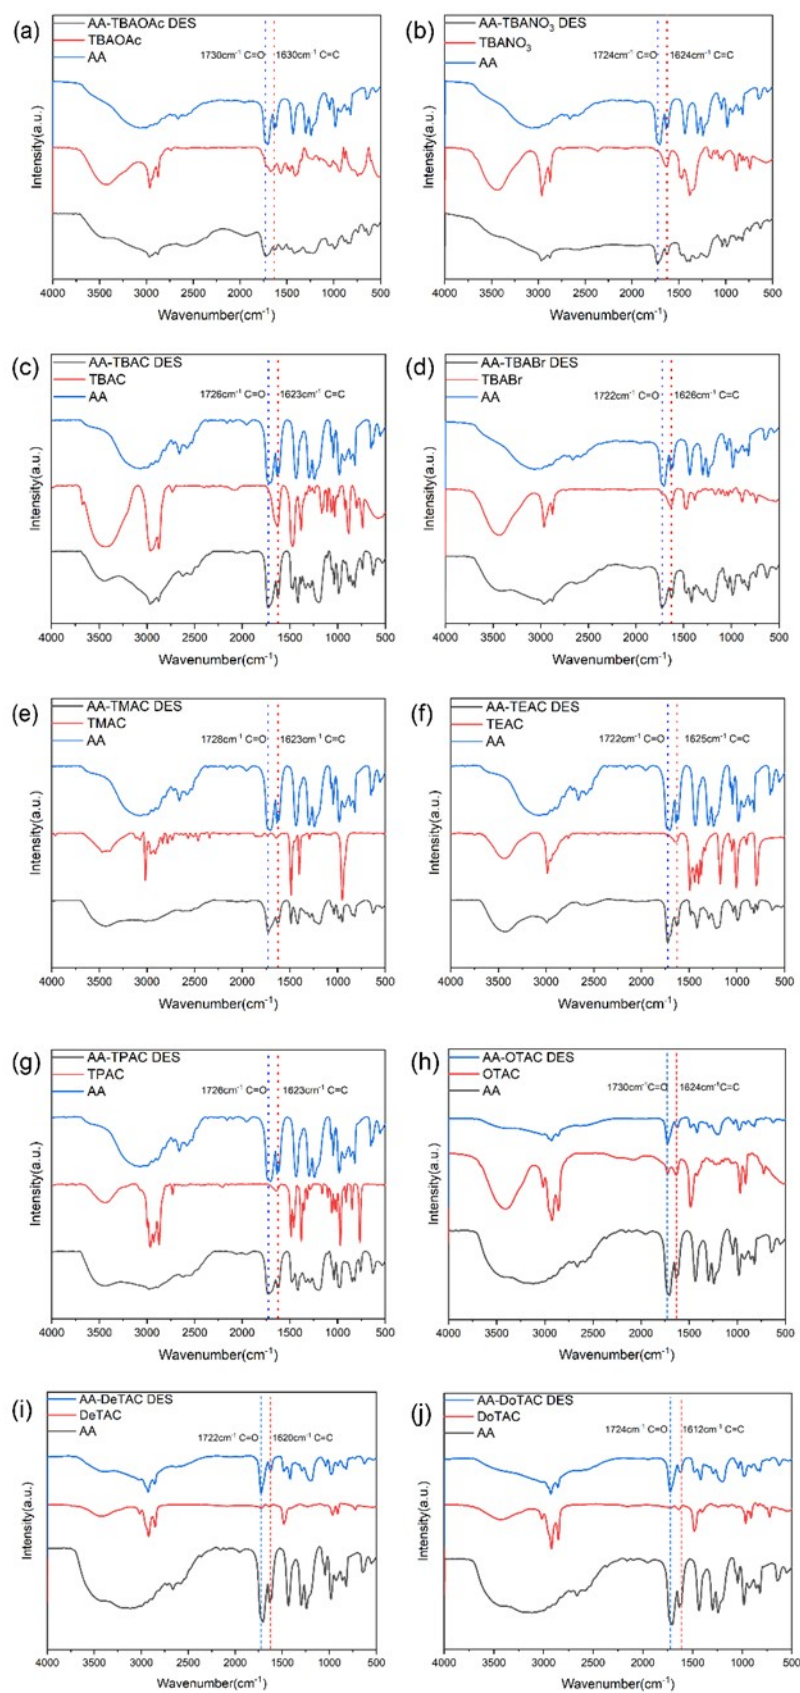

Fig. S2 Fourier transform infrared transform spectra of DES formed by AA and different hydrogen bond acceptors and its components

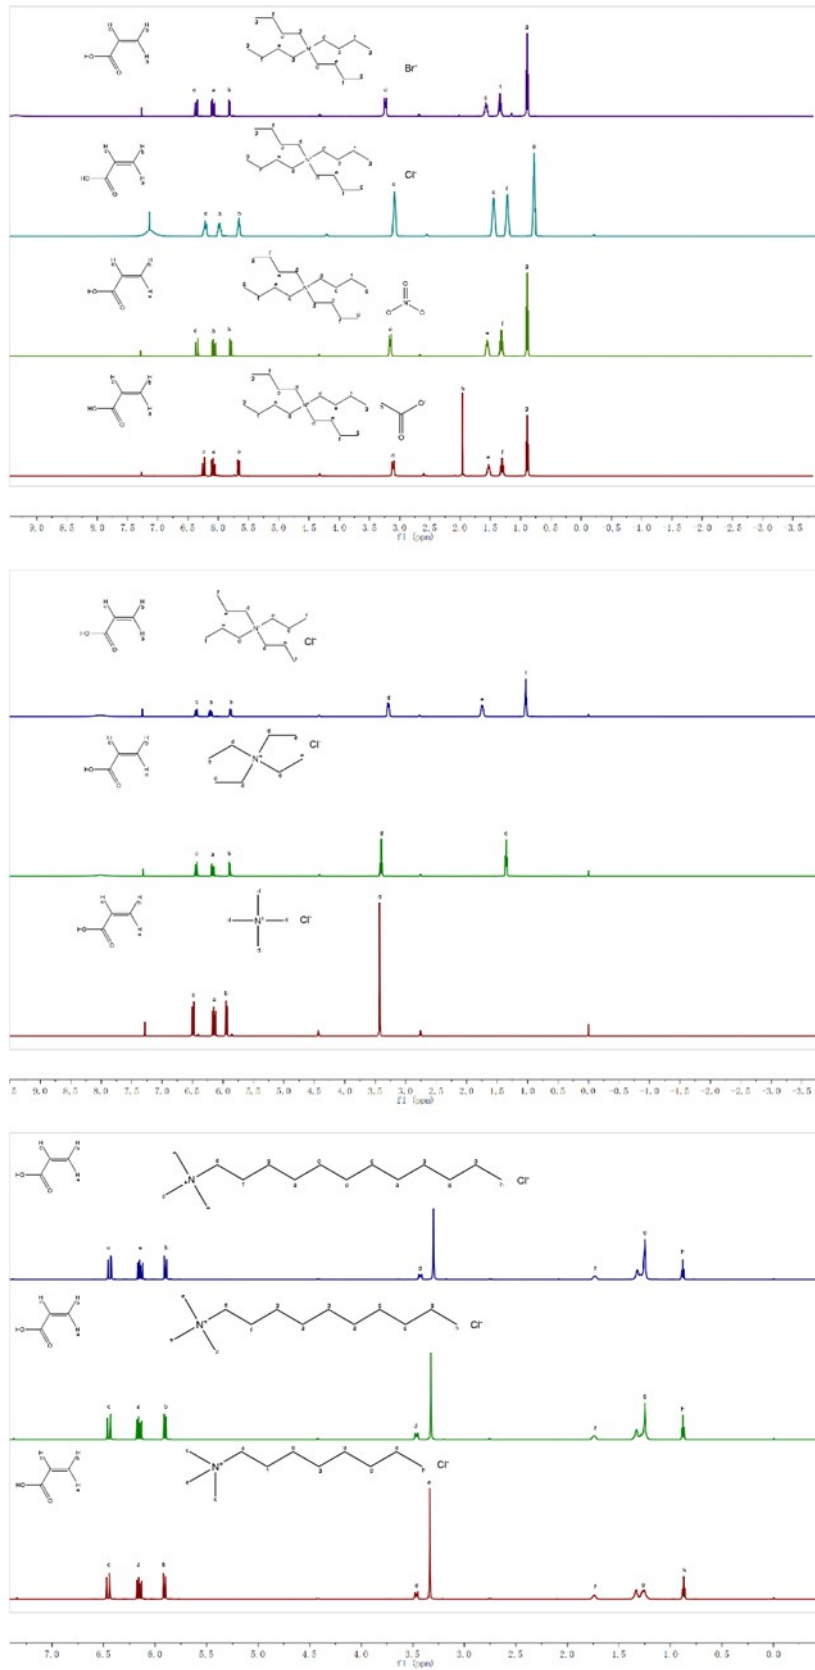

Fig. S3  $^1\text{H}$  NMR spectra of DES formed by AA and different hydrogen bond acceptors

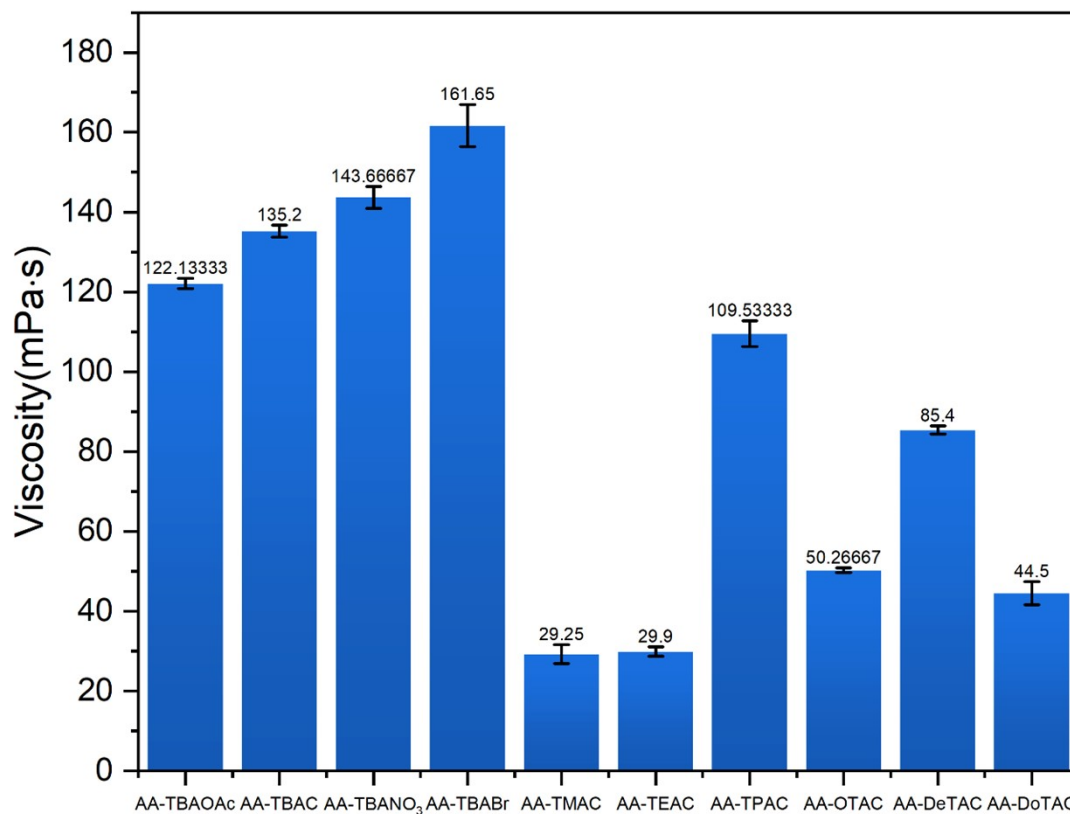

Fig. S4 Bar chart of initial viscosities for various PDES monomers.

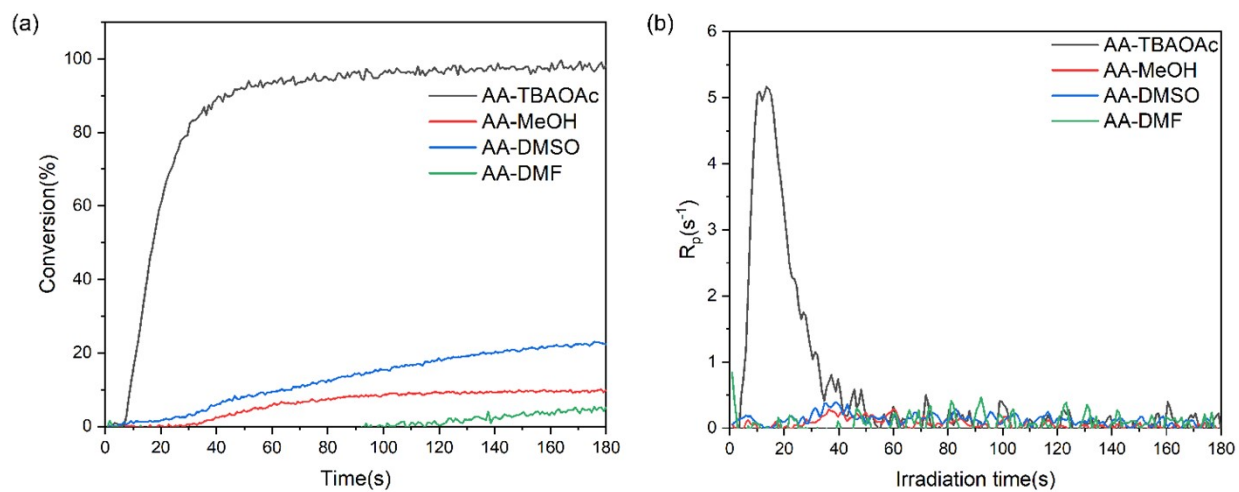

Fig S5 The real-time conversion of C=C double bonds (a) and the real-time polymerization rate (b) of monomers in inert solvents compared to PDES monomers during photopolymerization.

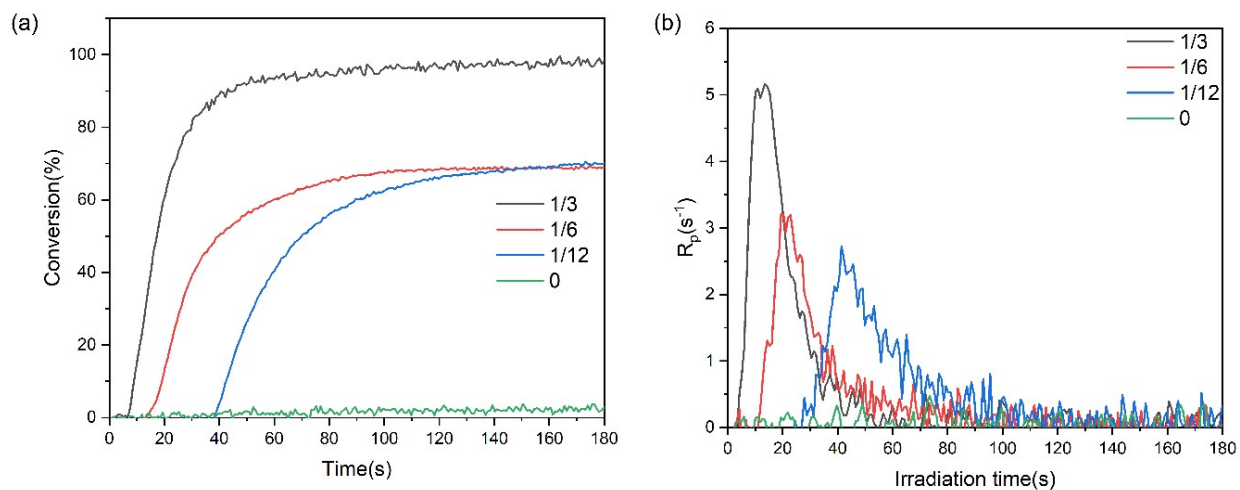

Fig.S6 The real-time conversion of C=C double bonds (a) and the polymerization rate (b) at various concentrations of quaternary ammonium salts.

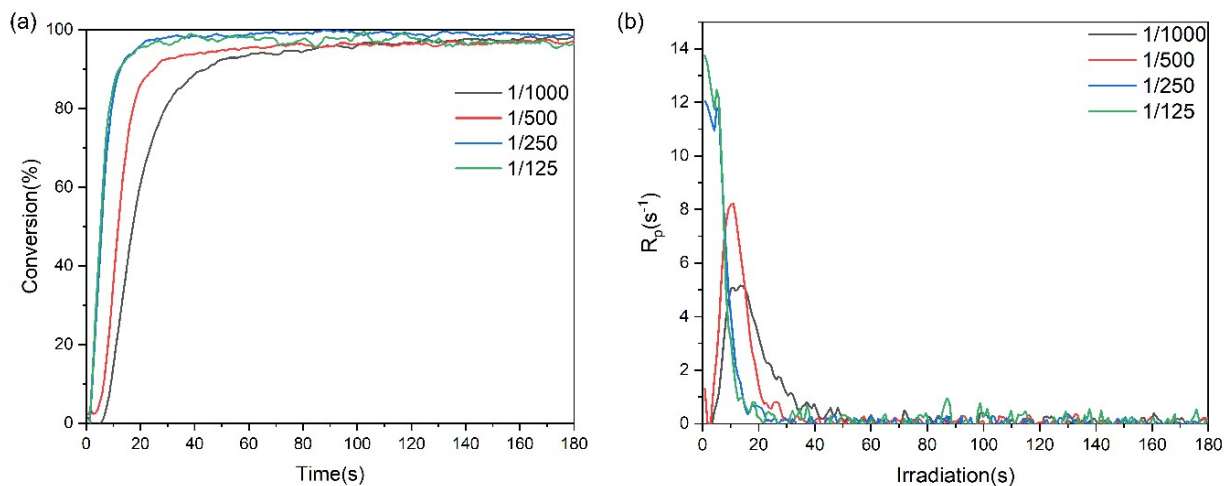

Fig. S7 The real-time conversion of C=C double bonds (a) and the polymerization rate (b) of AA-TBAOAc-type PDES monomers at different initiator concentrations within the same deep eutectic system.

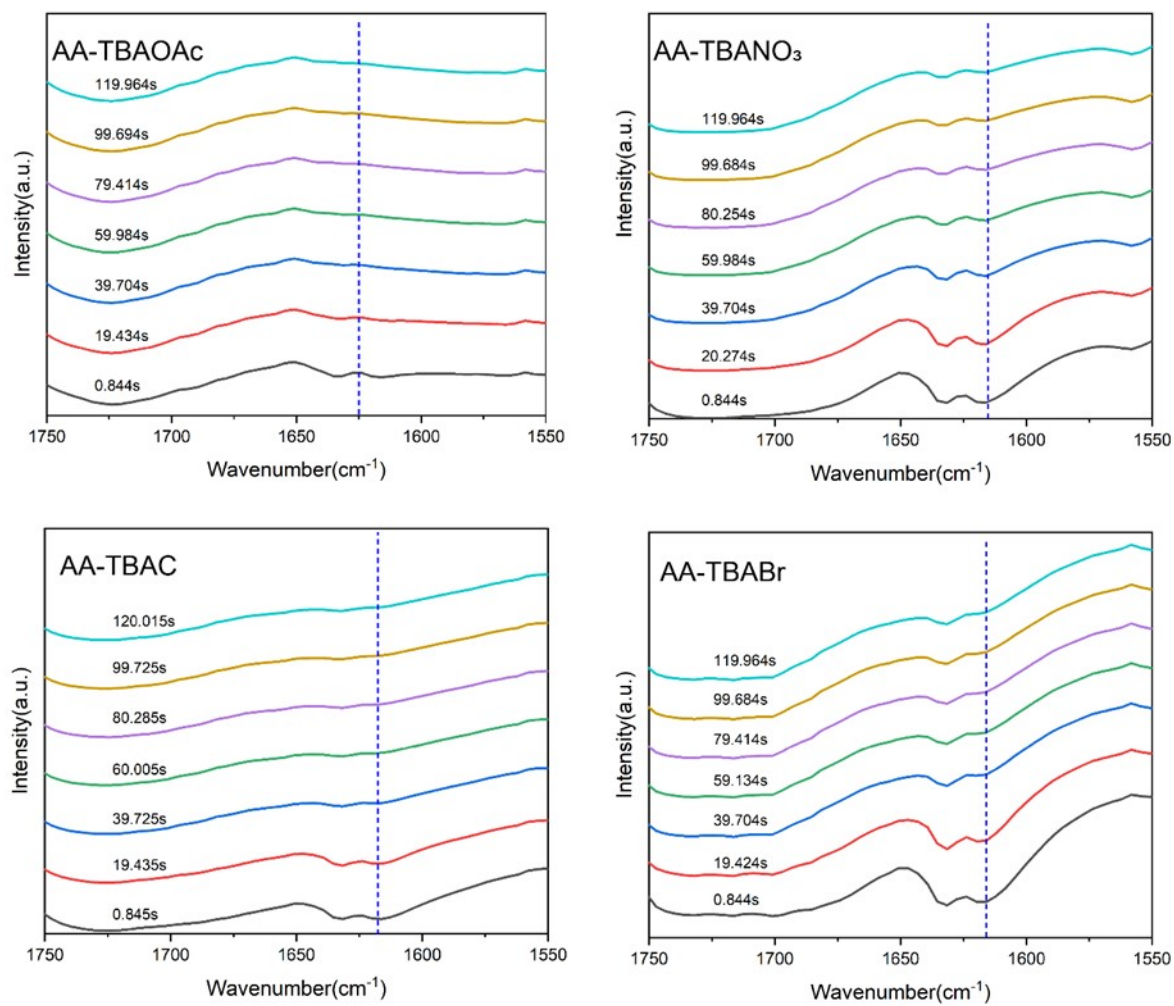

Fig. S8 Real-time infrared spectra of PDESs formed from AA and tetrabutyl quaternary ammonium salts composed of different anions

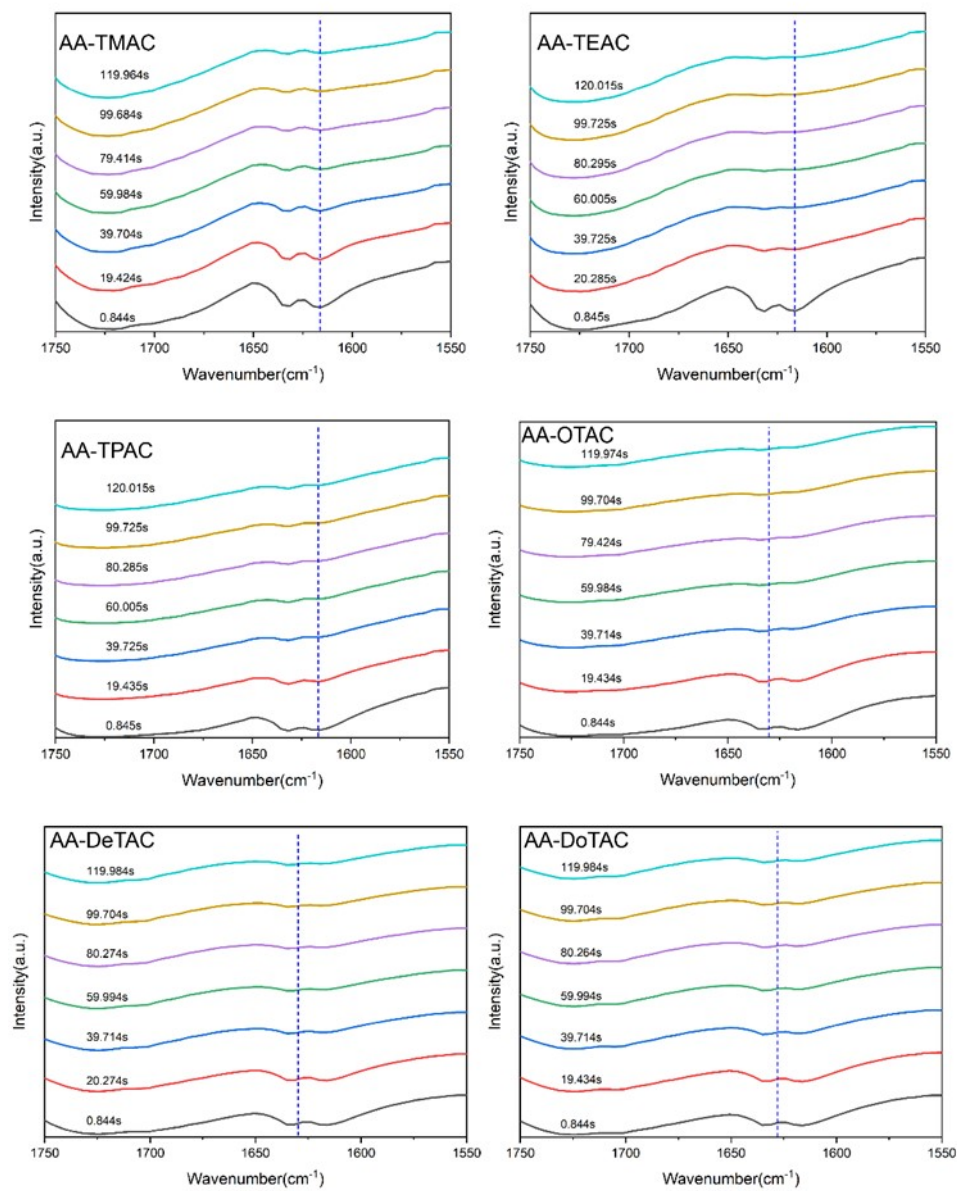

Fig. S9 Real-time infrared spectra of PDEs formed by AA and quaternary ammonium salts composed of different cations

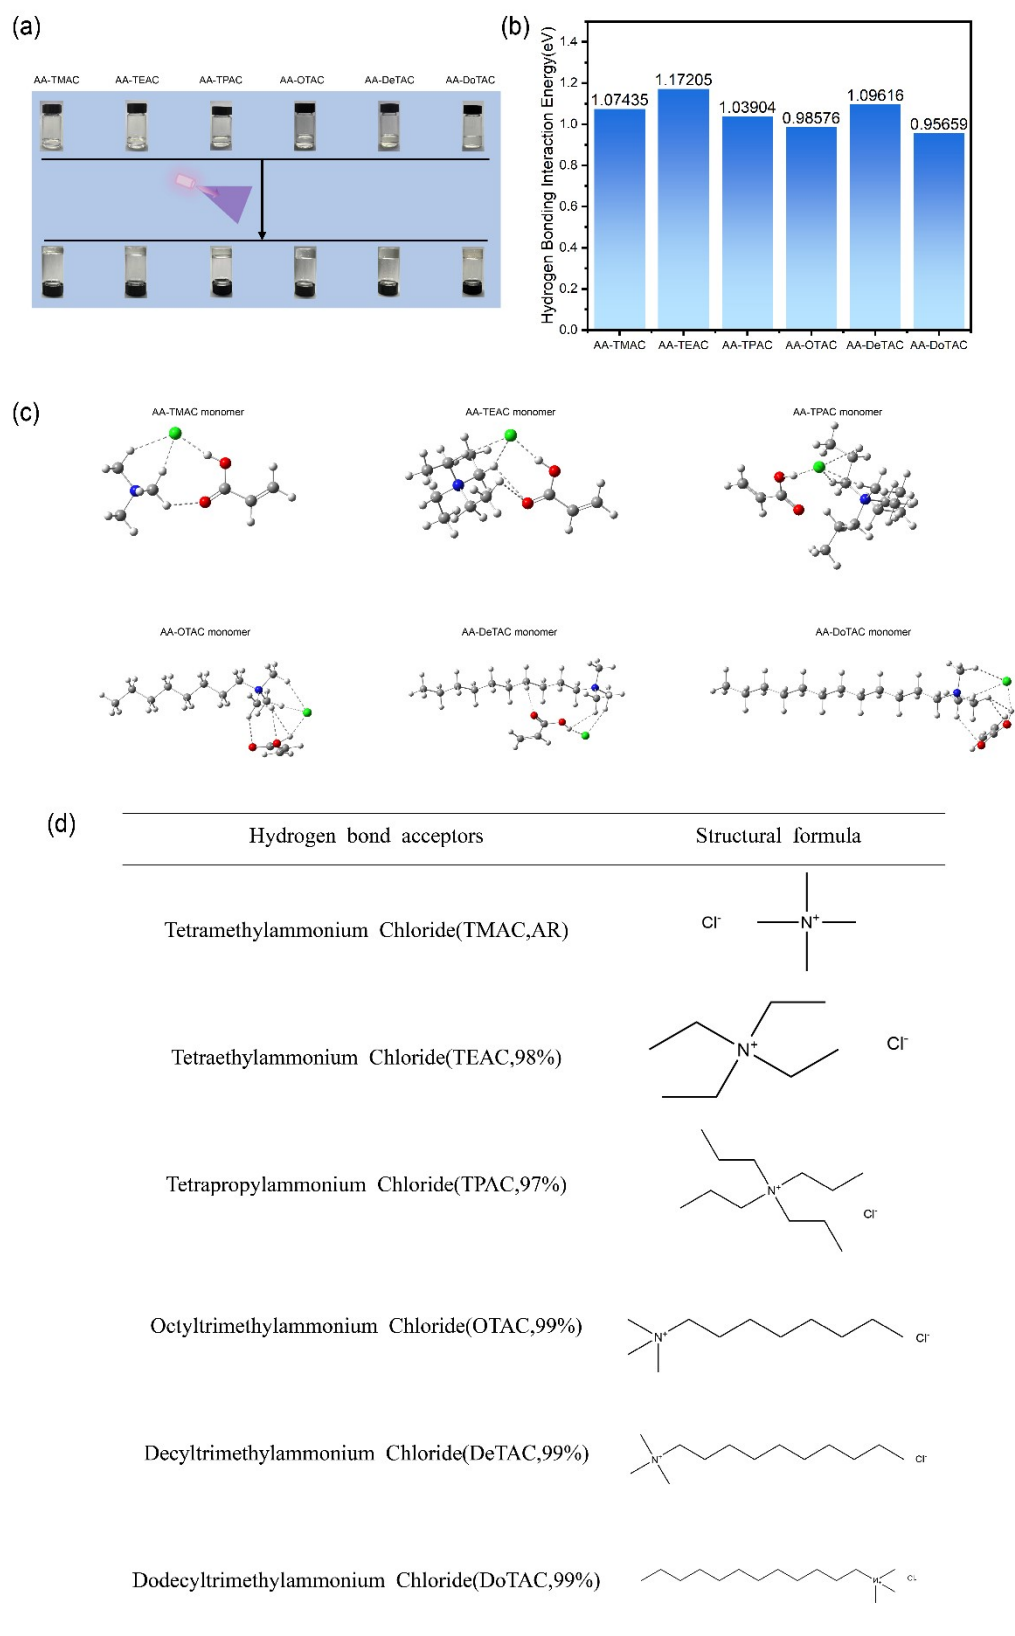

Fig. S10 Optical photographs of PDES monomers formed by different cationic quaternary ammonium salts before and after polymerization (a) Columnar statistics of hydrogen bonding interaction energies within PDES monomers (b) PDES monomers formed by hydrogen bonding of



AA with different cationic quaternary ammonium salts(c)Chemical structural formulae of  
hydrogen bonding acceptors (d)

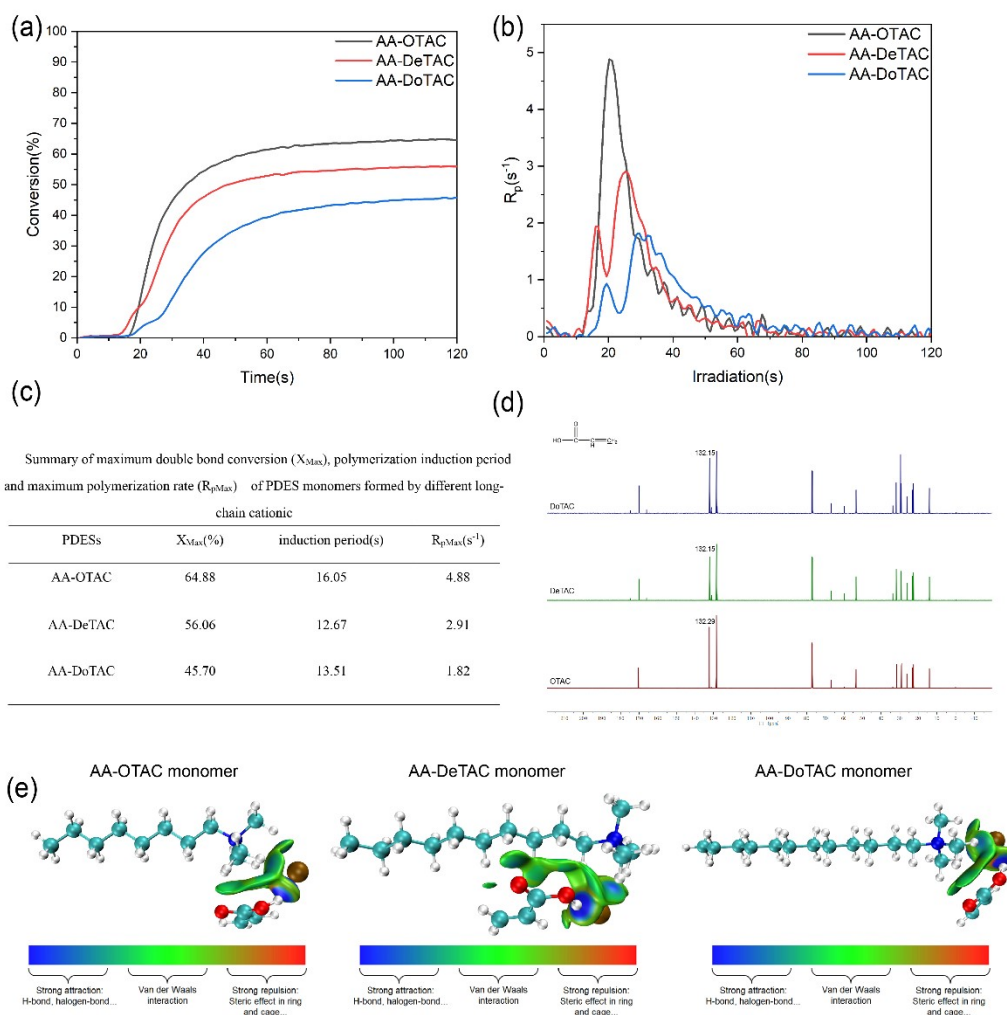

Fig. S11 Real-time conversion rates of double bonds (a), real-time polymerization rates (b), RT-FTIR parameters (c), <sup>13</sup>C-NMR spectra (d), and hydrogen-bonded adsorption configurations (e) of PDES monomers formed by AA with quaternary ammonium salts of different long-chain cationic (OTAC,DeTAC,DoTAC)

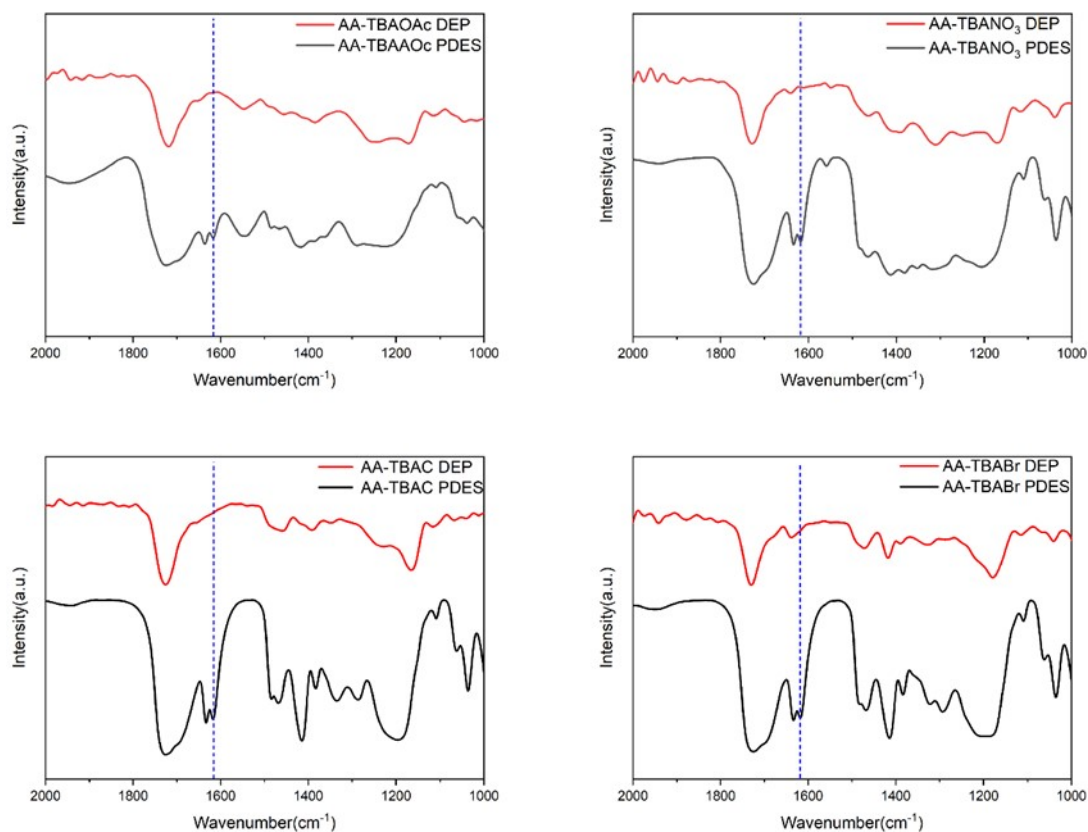

Fig. S12 Infrared spectra of different PDES systems before and after polymerization, the black line represents before polymerization, and the red line represents after polymerization  
The infrared spectra of DEP films from different systems and PDES.

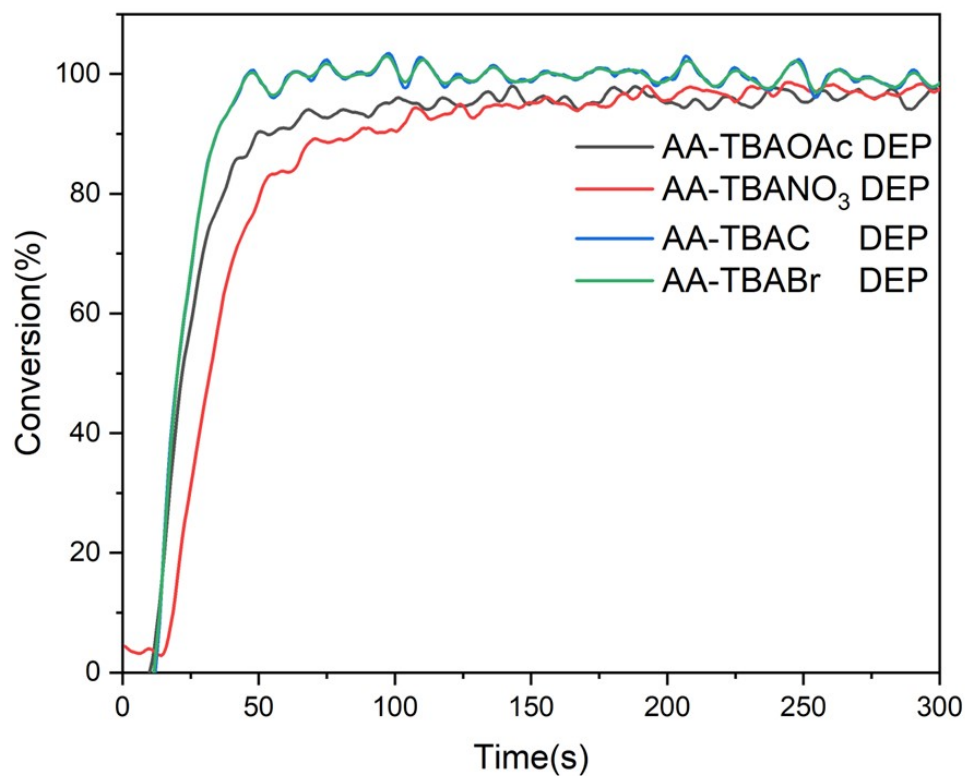

Fig. S13 The real-time conversion rate curve of C=C double bonds during the preparation of the

DEP film.

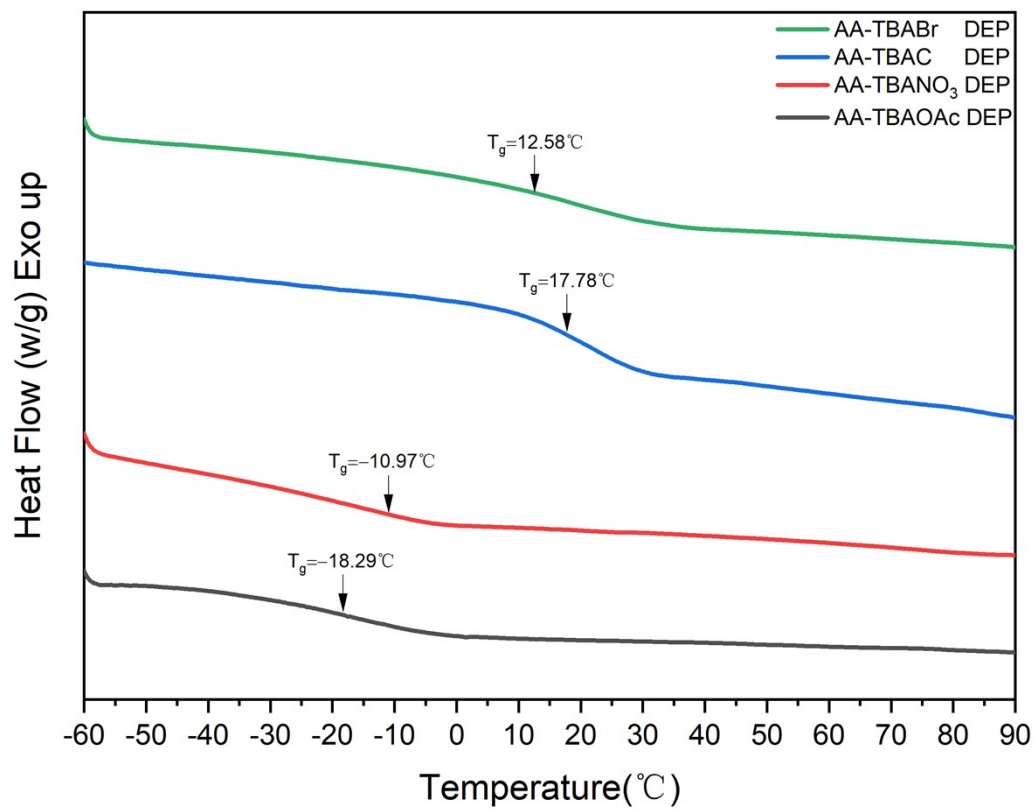

Fig. S14 Differential scanning calorimetry curves for different DEPs
